# Supplementary material for: Spatiotemporal accumulation of fatal pharyngeal entrapment of flatfish in harbour porpoises (Phocoena phocoena) in the German North Sea
Source: PeerJ. 2020 Oct 20;8:e10160. doi: 10.7717/peerj.10160 (PMC7583609; doi:10.7717/peerj.10160)
Supplement: Supplemental Information 2 — The calculated relative index values of the German sole survey and the BTS (Beam Trawl Survey). This index is calculated as the mean number of sole per hour trawling for each year in the investigation area. The index values for each time series were standardized by the mean and displayed in Fig. 6. [file peerj-08-10160-s002.xlsx]

## Sheet: Sole indices
Year	German sole index (2nd quarter)*	Beam Trawl Survey (3rd quarter)*
1976	68.8936	n.a.
1977	97.3535	n.a.
1978	255.319	n.a.
1979	n.a.	n.a.
1980	182.987	n.a.
1981	60.4264	n.a.
1982	129.821	n.a.
1983	191.4	n.a.
1984	238.432	n.a.
1985	125.069	41.2727
1986	41.9066	18.2222
1987	44.4013	39.6162
1988	36.172	51.7778
1989	89.6119	221.619
1990	95.4452	151.647
1991	207.844	117.929
1992	88.7926	158.156
1993	158.802	153.414
1994	261.844	72.7273
1995	n.a.	27.4759
1996	0.650976	29.4583
1997	27.8325	116.788
1998	26.3502	70.8718
1999	89.2547	73.4118
2000	47.8022	23.6471
2001	24.4619	20.7059
2002	20.9225	15.3125
2003	n.a.	21.875
2004	25.2226	11.5
2005	7.75702	16.375
2006	8.48705	16.25
2007	29.6123	23.375
2008	42.3147	29.75
2009	n.a.	20.2303
2010	30.8431	25.2339
2011	10.7392	40.5
2012	13.7647	13.7857
2013	n.a.	16.5714
2014	n.a.	23.2586
2015	n.a.	28.4722
2016	n.a.	18
2017	n.a.	7.9051
2018	n.a.	11.8152
2019	n.a.	41.7083
	* mean n per hour trawling
Figure 6	Standardized by the mean
Year	German sole index (2nd quarter)	Beam Trawl Survey (3rd quarter)
1976	0.817644	n.a.
1977	1.15541	n.a.
1978	3.03018	n.a.
1979	n.a.	n.a.
1980	2.17173	n.a.
1981	0.717153	n.a.
1982	1.54075	n.a.
1983	2.27157	n.a.
1984	2.82976	n.a.
1985	1.48435	0.815824
1986	0.497356	0.360192
1987	0.526964	0.783079
1988	0.429297	1.02347
1989	1.06353	4.38067
1990	1.13276	2.99755
1991	2.46674	2.33107
1992	1.05381	3.12622
1993	1.8847	3.03247
1994	3.10762	1.43757
1995	n.a.	0.543107
1996	0.00772593	0.582293
1997	0.330322	2.30851
1998	0.31273	1.4009
1999	1.05929	1.4511
2000	0.567327	0.467423
2001	0.290319	0.409286
2002	0.248312	0.302677
2003	n.a.	0.432396
2004	0.299347	0.227317
2005	0.0920619	0.323679
2006	0.100726	0.321208
2007	0.351445	0.462046
2008	0.502199	0.588058
2009	n.a.	0.399885
2010	0.366053	0.49879
2011	0.127455	0.800549
2012	0.163362	0.272497
2013	n.a.	0.327562
2014	n.a.	0.459745
2015	n.a.	0.562801
2016	n.a.	0.3558
2017	n.a.	0.156257
2018	n.a.	0.233547
2019	n.a.	0.824434
